# Supplementary material for: Progressive Domain Segregation in Early Embryonic Development and Underlying Correlation to Genetic and Epigenetic Changes
Source: Cells. 2021 Sep 23;10(10):2521. doi: 10.3390/cells10102521 (PMC8534146; doi:10.3390/cells10102521)
Supplement: Supplementary file 1 [file cells-10-02521-s001.zip › Additional file 2.Data_Sources.xlsx]

## Sheet: S1 Summary
Deposited Data	Source	Identifier	Details
Hi-C of mouse cells	Du Z et al. (2017)	GEO:GSE82185	Sheet: mouse_HiC
	Zhang Y et al. (2018)	GEO:GSE76505
	Krijger PH et al.(2016)	GEO:GSE76479
Hi-C of human cells	Chen X et al. (2019)	CRA000852	Sheet: human_HiC
	Schmitt AD et al. (2016)	GEO:GSE87112
	Chandra T et al. (2015)	PRJEB8073
DNA methylation of mouse embryonic cells	Wang L et al. (2014)	GEO:GSE56697	Sheet: mouse_embryo_methylation
	Zhang Y et al. (2018)	GEO:GSE76505
	Smith ZD et al. (2017)	GEO:GSE84235
	Wang C et al. (2018)	GEO:GSE98151
DNA methylation of mouse normal somatic cells	ENCODE	https://www.encodeproject.org/files/	Sheet: mouse_tissue_methylation
DNA methylation of human normal somatic cells	M. D. Schultz et al. (2015)	http://neomorph.salk.edu/human_tissue_methylomes.html	Sheet: human_tissue_methylation
	BLUEPRINT	http://www.blueprint-epigenome.eu/
	R. Lister et al.(2013)	http://neomorph.salk.edu/brain_methylomes/
Expression of mouse cells	Zhang B et al. (2016)	GEO:GSE71434	Sheet: mouse_expression
	Zhang Y et al. (2018)	GEO:GSE76505
Lamina-associated domains of mouse embryo cells	Borsos M et al.(2019)	GEO:GSE112551
Epigenetic data of mouse embryonic cells	Zhang B et al. (2016)	GEO:GSE71434	Sheet: mouse_embryo_epigenetics
	Zheng H et al. (2016)	GEO:GSE76687
	Wu J et al. (2016)	GEO:GSE66390

## Sheet: S2 mouse_HiC
Number	Sample name	Label	Cell type	Accession	Reference
1	MII oocyte	MII	Pre-implantation embryonic cells	GSE82185	Du Z, Zheng H, Huang B, Ma R et al. Allelic reprogramming of 3D chromatin architecture during early mammalian development. Nature. 2017;547:232-5.
2	pronuclear stage 3	PN3
3	pronuclear stage 5	PN5
4	Early 2-cell	Early_2cell
5	alpha-amanitin-20h	alpha-amanitin-treated-20h
6	Late 2-cell	Late_2cell
7	alpha-amanitin-45h	alpha-amanitin-treated-45h
8	8-cell	8cell
9	MII oocyte	MII	Materal samples
10	pronuclear stage 3 maternal	PN3
11	pronuclear stage 5 maternal	PN5
12	Early 2-cell maternal	Early_2cell
13	Late 2-cell materal	Late_2cell
14	8-cell maternal	8cell
15	ICM maternal	ICM
16	pronuclear stage 3 paternal	PN3	Pateral samples
17	pronuclear stage 5 paternal	PN5
18	Early 2-cell paternal	Early_2cell
19	Late 2-cell paternal	Late_2cell
20	8-cell paternal	8cell
21	ICM paternal	ICM
22	ICM	ICM	Post-implantation embryonic cells	GSE76505	Zhang Y, Xiang Y, Yin Q, Du Z, Peng X, Wang Q, et al. Dynamic epigenomic landscapes during early lineage specification in mouse embryos. Nature Genetics. 2018;50:96–105.
23	E6.5 epiblast	E6.5Epi
24	E7.5 ectoderm	E7.5Ecto
25	Pre-B cells	PreB	Differentiated cells	GSE76479	Krijger PH, Di Stefano B, de Wit E, Limone F et al. Cell-of-Origin-Specific 3D Genome Structure Acquired during Somatic Cell Reprogramming. Cell Stem Cell 2016;18:597-610.

## Sheet: S3 human_HiC
Number	Sample	Cell type	Accession	Reference
1	2cell	embryonic cells	CRA000852	Chen, X., Ke, Y., Wu, K. et al. Key role for CTCF in establishing chromatin structure in human embryos. Nature 2019; 576, 306–310.
2	8cell
3	morula
4	blastocyst
5	6week
6	h1	embryonic stem cells	GSE87112	Schmitt AD, Hu M, Jung I, Xu Z et al. A Compendium of Chromatin Contact Maps Reveals Spatially Active Regions in the Human Genome. Cell Rep. 2016;17:2042-59.
7	cortex	ectoderm-derived somatic cells
8	hippocampus
9	adrenal	mesoderm-derived somatic cells
10	aorta
11	left ventricle
12	ovary
13	psoas
14	right ventricle
15	spleen
16	bladder	endoderm-derived somatic cells
17	liver
18	lung
19	pancreas
20	small bowel
21	senescence1	senescent cells	PRJEB8073	Chandra T, Ewels PA, Schoenfelder S, Furlan-Magaril M, Wingett SW, Kirschner K, Thuret JY, Andrews S, Fraser P and Reik W. Global reorganization of the nuclear landscape in senescent cells. Cell Rep. 2015;10: 471-83.
22	senescence2
23	grow1	growing cells
24	grow2

## Sheet: S4 mouse_embryo_methylation
Number	Label	Cell type	Accession	Reference
1	2cell	2-cell embryo	GSE56697	Wang L, Zhang J, Duan J, Gao X et al. Programming and inheritance of parental DNA methylomes in mammals. Cell 2014;157(4):979-991.
2	4cell	4-cell embryo
3	ICM	E3.5 inner cell mass
4	E65	E6.5 embryo
5	E75	E7.5 embryo
6	E35TE	E3.5 trophectoderm	GSE76505	Zhang Y, Xiang Y, Yin Q, Du Z, Peng X, Wang Q, et al. Dynamic epigenomic landscapes during early lineage specification in mouse embryos. Nature Genetics. 2018;50:96–105.
7	E40ICM	E4.0 inner cell mass
8	E55Epi	E5.5 epiblast
9	E55VE	E5.5 visceral endoderm
10	E65Epi	E6.5 epiblast
11	E65VE	E6.5 visceral endoderm
12	Ect	E7.5 ectoderm
13	Mes	E7.5 mesoderm
14	End	E7.5 endoderm
15	PS	E7.5 primitive streak
16	8cell_rep1	E2.25 8 cell stage embryo	GSE84235	Smith ZD, Shi J, Gu H, Donaghey J et al. Epigenetic restriction of extraembryonic lineages mirrors the somatic transition to cancer. Nature 2017; 549(7673):543-547.
17	8cell_rep2
18	ICM_rep1	E3.5 inner cell mass
19	ICM_rep2
20	TE_rep1	E3.5 trophectoderm
21	TE_rep2
22	Epi_rep1	E6.5 proximal epiblast
23	Epi_rep2
24	Exe_rep1	E6.5 extraembryonic ectoderm
25	Exe_rep2
26	zygote	zygote	GSE98151	Wang C, Liu X, Gao Y, Yang L et al. Reprogramming of H3K9me3-dependent heterochromatin during mammalian embryo development. Nat Cell Biol. 2018 May;20(5):620-631.
27	early_2cell	early 2-cell embryo
28	late_2cell	late 2-cell embry
29	4cell	4-cell embryo
30	8cell	8-cell embryo
31	morula	morula
32	ICM	inner cell mass
33	TE	trophoblast
34	E65Epi	6.5 day embryo epiblast
35	E65Exe	6.5 day embryo extraembryonic ectoderm
36	E75Epi	7.5 day embryo epiblast
37	E75Exe	7.5 day embryo extraembryonic ectoderm

## Sheet: S5 mouse_tissue_methylation
Number	Accession	Cell types	Categories	Website
1	ENCFF886MNA	embryonicfacialprominence.E10.5	ectoderm-derived cells	https://www.encodeproject.org/files/
2	ENCFF095VLL	embryonicfacialprominence.E10.5
3	ENCFF306DKT	embryonicfacialprominence.E11.5
4	ENCFF083XWZ	embryonicfacialprominence.E11.5
5	ENCFF698HGV	embryonicfacialprominence.E12.5
6	ENCFF497NGX	embryonicfacialprominence.E12.5
7	ENCFF311GQV	embryonicfacialprominence.E13.5
8	ENCFF235LSX	embryonicfacialprominence.E13.5
9	ENCFF989UNH	embryonicfacialprominence.E14.5
10	ENCFF686ZQQ	embryonicfacialprominence.E14.5
11	ENCFF581CMO	embryonicfacialprominence.E15.5
12	ENCFF396QSA	embryonicfacialprominence.E15.5
13	ENCFF446IJS	forebrain.0d
14	ENCFF783ZKP	forebrain.0d
15	ENCFF977BKF	forebrain.E10.5
16	ENCFF365XZL	forebrain.E10.5
17	ENCFF530SDQ	forebrain.E11.5
18	ENCFF144FZS	forebrain.E11.5
19	ENCFF326BGA	forebrain.E12.5
20	ENCFF078XSR	forebrain.E12.5
21	ENCFF140TCV	forebrain.E13.5
22	ENCFF356GTX	forebrain.E13.5
23	ENCFF873SBV	forebrain.E14.5
24	ENCFF321BQX	forebrain.E14.5
25	ENCFF310XUL	forebrain.E15.5
26	ENCFF146KIN	forebrain.E15.5
27	ENCFF592SYK	forebrain.E16.5
28	ENCFF098QRE	forebrain.E16.5
29	ENCFF303GFV	hindbrain.0d
30	ENCFF433NPI	hindbrain.0d
31	ENCFF550IDR	hindbrain.E10.5
32	ENCFF507ENU	hindbrain.E10.5
33	ENCFF172LOQ	hindbrain.E12.5
34	ENCFF599BKR	hindbrain.E12.5
35	ENCFF467JWP	hindbrain.E13.5
36	ENCFF894POI	hindbrain.E13.5
37	ENCFF434IOR	hindbrain.E14.5
38	ENCFF362ENF	hindbrain.E14.5
39	ENCFF941BTB	hindbrain.E15.5
40	ENCFF949ZVJ	hindbrain.E15.5
41	ENCFF994CUN	hindbrain.E16.5
42	ENCFF407TGX	hindbrain.E16.5
43	ENCFF504HKC	midbrain.0d
44	ENCFF966UJE	midbrain.0d
45	ENCFF672VOP	midbrain.E10.5
46	ENCFF995WMY	midbrain.E10.5
47	ENCFF611XAY	midbrain.E11.5
48	ENCFF750DYD	midbrain.E11.5
49	ENCFF390NTN	midbrain.E12.5
50	ENCFF393VFF	midbrain.E12.5
51	ENCFF326GKU	midbrain.E13.5
52	ENCFF646TSJ	midbrain.E13.5
53	ENCFF897NOL	midbrain.E14.5
54	ENCFF793ZHN	midbrain.E14.5
55	ENCFF688RHG	midbrain.E15.5
56	ENCFF426XRG	midbrain.E15.5
57	ENCFF796POX	midbrain.E16.5
58	ENCFF320XZV	midbrain.E16.5
59	ENCFF859JHQ	neuraltube.E11.5
60	ENCFF943HMN	neuraltube.E11.5
61	ENCFF231BLL	neuraltube.E12.5
62	ENCFF697TML	neuraltube.E12.5
63	ENCFF937GFF	neuraltube.E14.5
64	ENCFF152IRW	neuraltube.E14.5
65	ENCFF115JNG	neuraltube.E15.5
66	ENCFF192NIG	neuraltube.E15.5
67	ENCFF467UEZ	heart.0d	mesoderm-derived cells
68	ENCFF096RYX	heart.0d
69	ENCFF428AXW	heart.E10.5
70	ENCFF751DLO	heart.E10.5
71	ENCFF107UNJ	heart.E11.5
72	ENCFF008KDS	heart.E11.5
73	ENCFF816XTJ	heart.E12.5
74	ENCFF464PLY	heart.E12.5
75	ENCFF114EIZ	heart.E13.5.unfull
76	ENCFF711PFS	heart.E13.5.unfull
77	ENCFF925EPJ	heart.E14.5
78	ENCFF203TRR	heart.E14.5
79	ENCFF951TJQ	heart.E15.5
80	ENCFF963WCA	heart.E15.5
81	ENCFF574RDQ	heart.E16.5
82	ENCFF633ZDN	heart.E16.5
83	ENCFF226ISA	kidney.0d
84	ENCFF745SMP	kidney.0d
85	ENCFF078LCR	kidney.E14.5
86	ENCFF783ZZK	kidney.E14.5
87	ENCFF478YVH	kidney.E16.5
88	ENCFF444WNU	kidney.E16.5
89	ENCFF572FTW	limb.E10.5
90	ENCFF558LRK	limb.E10.5
91	ENCFF800JCD	limb.E11.5
92	ENCFF644JJD	limb.E11.5
93	ENCFF103DRR	limb.E12.5
94	ENCFF080DSY	limb.E12.5
95	ENCFF556ENA	limb.E13.5
96	ENCFF834PXN	limb.E13.5
97	ENCFF176VLZ	limb.E14.5
98	ENCFF038IVS	limb.E14.5
99	ENCFF724AJN	limb.E15.5
100	ENCFF613ASH	limb.E15.5
101	ENCFF644XMA	intestine.0d	endoderm-derived cells
102	ENCFF968JQK	intestine.0d
103	ENCFF550JOH	intestine.E14.5
104	ENCFF232RQE	intestine.E14.5
105	ENCFF488REA	intestine.E15.5
106	ENCFF963EBD	intestine.E15.5
107	ENCFF895RRK	intestine.E16.5
108	ENCFF690ADB	intestine.E16.5
109	ENCFF770AUO	liver.0d
110	ENCFF195LEN	liver.0d
111	ENCFF903TZX	liver.E11.5
112	ENCFF306MCB	liver.E11.5
113	ENCFF134ECD	liver.E12.5
114	ENCFF624JYN	liver.E12.5
115	ENCFF516VJL	liver.E13.5
116	ENCFF178WUX	liver.E13.5
117	ENCFF288JXO	liver.E14.5
118	ENCFF079JQZ	liver.E14.5
119	ENCFF553AFX	liver.E15.5
120	ENCFF371FSG	liver.E15.5
121	ENCFF243ELJ	liver.E16.5
122	ENCFF363NVM	liver.E16.5
123	ENCFF920WHY	lung.0d
124	ENCFF555SRI	lung.0d
125	ENCFF070FVI	lung.E14.5
126	ENCFF054AYU	lung.E14.5
127	ENCFF138NBE	lung.E15.5
128	ENCFF922AMS	lung.E15.5
129	ENCFF359CFG	lung.E16.5
130	ENCFF222XYK	lung.E16.5
131	ENCFF051OZQ	stomach.0d
132	ENCFF562RGL	stomach.0d
133	ENCFF720OAC	stomach.E14.5
134	ENCFF029NDO	stomach.E14.5
135	ENCFF880SXA	stomach.E15.5
136	ENCFF301QSZ	stomach.E15.5
137	ENCFF532SZJ	stomach.E16.5
138	ENCFF803ATF	stomach.E16.5

## Sheet: S6 human_tissue_methylation
Number	Label	Tissue	Germ layer	Age	Reference
1	fat_1	fat	mesoderm	3 years	Schultz MD et al. Human Body Epigenome Maps Reveal Noncanonical DNA Methylation Variation. Nature. 2015;523: 212. http://neomorph.salk.edu/human_tissue_methylomes.html
2	left_ventricle_1	left ventricle	mesoderm
3	lung_1	lung	endoderm
4	psoas_1	psoas	mesoderm
5	right_ventricle_1	right ventricle	mesoderm
6	sigmoid_colon_1	sigmoid colon	endoderm
7	small_bowel_1	small bowel	endoderm
8	spleen_1	spleen	mesoderm
9	thymus_1	thymus	endoderm
10	adrenal_2	adrenal	mesoderm	30 years
11	aorta_2	aorta	mesoderm
12	esophagus_2	esophagus	endoderm
13	fat_2	fat	mesoderm
14	lung_2	lung	endoderm
15	ovary_2	ovary	mesoderm
16	pancreas_2	pancreas	endoderm
17	psoas_2	psoas	mesoderm
18	small_bowel_2	small bowel	endoderm
19	spleen_2	spleen	mesoderm
20	adrenal_3	adrenal	mesoderm	34 years
21	aorta_3	aorta	mesoderm
22	esophagus_3	esophagus	endoderm
23	fat_3	fat	mesoderm
24	left_ventricle_3	left ventricle	mesoderm
25	pancreas_3	pancreas	endoderm
26	psoas_3	psoas	mesoderm
27	right_atrium_3	right atrium	mesoderm
28	right_ventricle_3	right ventricle	mesoderm
29	simoid_colon_3	simoid colon	endoderm
30	small_bowel_3	small bowel	endoderm
31	spleen_3	spleen	mesoderm
32	liver_11	liver	endoderm	32 years
33	cerebral cortex	fetal	Ectoderm	20 weeks	Lister R et al. Global Epigenomic Reconfiguration During Mammalian Brain Developmen. Science. 2013;341:127905. http://neomorph.salk.edu/brain_methylomes/
34	middle frontal gyrus	35do		35 days
35		2yr		2 years
36		5yr		5 years
37		12yr		12 years
38		16yr		16 years
39		25yr		25 years
40	dorsal prefrontal cortex	53yr_neg		53 years
41		53yr_pos
42		55yr_neg		55 years
43		55yr_pos
44		55yr_tissue
45	frontal cortex	64yr		64 years
46	C000S5A2bs	Mature neutrophil cells	Mesoderm	65-70 years	http://www.blueprint-epigenome.eu/
47	C0010KA1bs			60-65 years
48	C0011IA3bs			50-55 years
49	C001UYA1bs			60-65 years
50	S00FWHA1			30-35 years
51	S00FXFA1			30-35 years
52	S00K5EA1			55-60 years
53	S00K7AA1			70-75 years
54	S00K88A1			70-75 years
55	S00TC1A1			55-60 years

## Sheet: S7 mouse_expression
Number	Label	Cell type	Accession	Reference
1	PN5_zygote	pronuclear stage 5	GSE71434	Zhang B, Zheng H, Huang B, Li W et al. Allelic reprogramming of the histone modification H3K4me3 in early mammalian development. Nature 2016;537(7621):553-557.
2	2cell_early	early 2cell
3	2cell_late	late 2cell
4	4cell	4cell
5	8cell	8cell
6	ICM	inner cell mass
7	E35ICM	E3.5 inner cell mass	GSE76505	Zhang Y, Xiang Y, Yin Q, Du Z, Peng X, Wang Q, et al. Dynamic epigenomic landscapes during early lineage specification in mouse embryos. Nature Genetics. 2018;50:96–105.
8	E40ICM	E4.0 inner cell mass
9	E55Epi	E5.5 epiblast
10	E65Epi	E6.5 epiblast
11	Ect	E7.5 ectoderm
12	Mes	E7.5 mesoderm
13	End	E7.5 endoderm

## Sheet: S8_mouse_embryo_epigenetics
Number	Label	Cell type	Accession	Reference
1	PN5_zygote	pronuclear stage 5	GSE71434	Zhang B, Zheng H, Huang B, Li W et al., Allelic reprogramming of the histone modification H3K4me3 in early mammalian development. Nature 2016;537(7621):553-557.
2	2cell_early	early 2cell
3	2cell_late	late 2cell
4	4cell	4cell
5	8cell	8cell
6	ICM	inner cell mass
7	8cell	8cell	GSE76687	Zheng H, Huang B, Zhang B, Xiang Y et al., Epigenetic Memory by Reprogramming of Histone Modifications in Mammals. Mol Cell 2016;63(6):1066-1079.
8	ICM	inner cell mass
9	8cell	8cell	GSE66390	Wu J, Huang B, Chen H, Yin Q et al., The landscape of accessible chromatin in mammalian preimplantation embryos. Nature 2016;534(7609):652-657.
10	ICM	inner cell mass
